# Supplementary material for: Delayed cytokinesis generates multinuclearity and potential advantages in the amoeba Acanthamoebacastellanii Neff strain
Source: PubMed Central journal article supplement (PMC7374626; doi:10.1038/s41598-020-68694-9), 2020-07-21
Supplement: 41598_2020_68694_MOESM1_ESM.pdf [file 41598_2020_68694_MOESM1_ESM.pdf]

# Delayed cytokinesis generates multinuclearity and potential advantages in the amoeba *Acanthamoeba castellanii* Neff strain

Théo Quinet<sup>1</sup>, Ascel Samba-Louaka<sup>2</sup>, Yann Héchard<sup>2</sup>, Karine Van Doninck<sup>1</sup> & Charles Van der Henst<sup>1,3,4,5\*</sup>

## Affiliations

<sup>1</sup> Laboratory of Evolutionary Genetics and Ecology, URBE, University of Namur, Belgium.

<sup>2</sup> Laboratoire Ecologie et Biologie des Interactions, Equipe Microbiologie de l'Eau, Université de Poitiers, UMR CNRS 7267, F-86073 Poitiers, France.

<sup>3</sup> Research Unit in the Biology of Microorganisms (URBM), NARILIS, University of Namur (UNamur), Belgium.

<sup>4</sup> Microbial Resistance and Drug Discovery, VIB-VUB Center for Structural Biology, VIB, Flanders Institute for Biotechnology, Brussels, Belgium.

<sup>5</sup> Structural Biology Brussels, Vrije Universiteit Brussel (VUB), Brussels, Belgium.

**\*Corresponding author:** [charles.vanderhenst@vub.vib.be](mailto:charles.vanderhenst@vub.vib.be)

Dr. Charles Van der Henst, VIB-VUB Group leader, Microbial Resistance and Drug Discovery, Flanders Institute for Biotechnology (VIB), Vrije Universiteit Brussel (VUB), Center for Structural Biology (CSB), Pleinlaan 2, Building E-3, 1050 Brussels (BE), +32 (0) 2 629 19 40

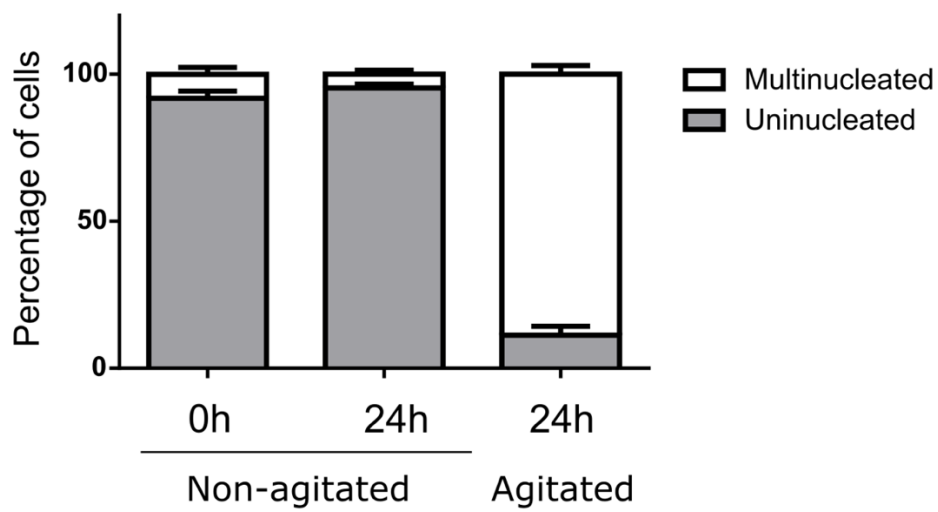

**Figure S1: Multinuclearity induced in *V. vermiformis*.** Percentage of multinucleated *V. vermiformis* under agitation (Agitated) or not (Non-agitated) for 0h and 24h. Results are averages of three independent experiments, and error bars represent the standard error of the mean ( $\pm$ SEM). Statistical analysis was performed using the Unpaired t-test (\*\*\*)  $p < 0.0001$ .

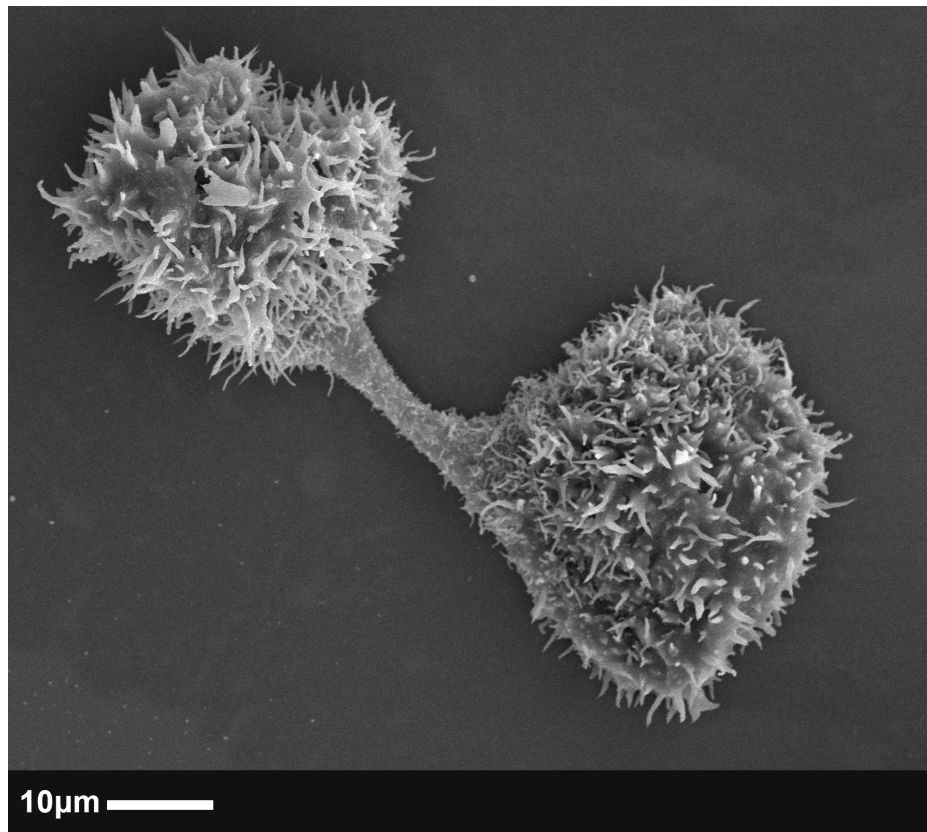

**Figure S2. Cytosolic bridge of *A. castellanii*.** Scanning electron microscopy of a multinucleate amoeba cell undergoing cytokinesis. A cytosolic bridge characteristic of multinucleate dividing cells is visible in between the two cell bodies. Scale bar: 10  $\mu\text{m}$ .

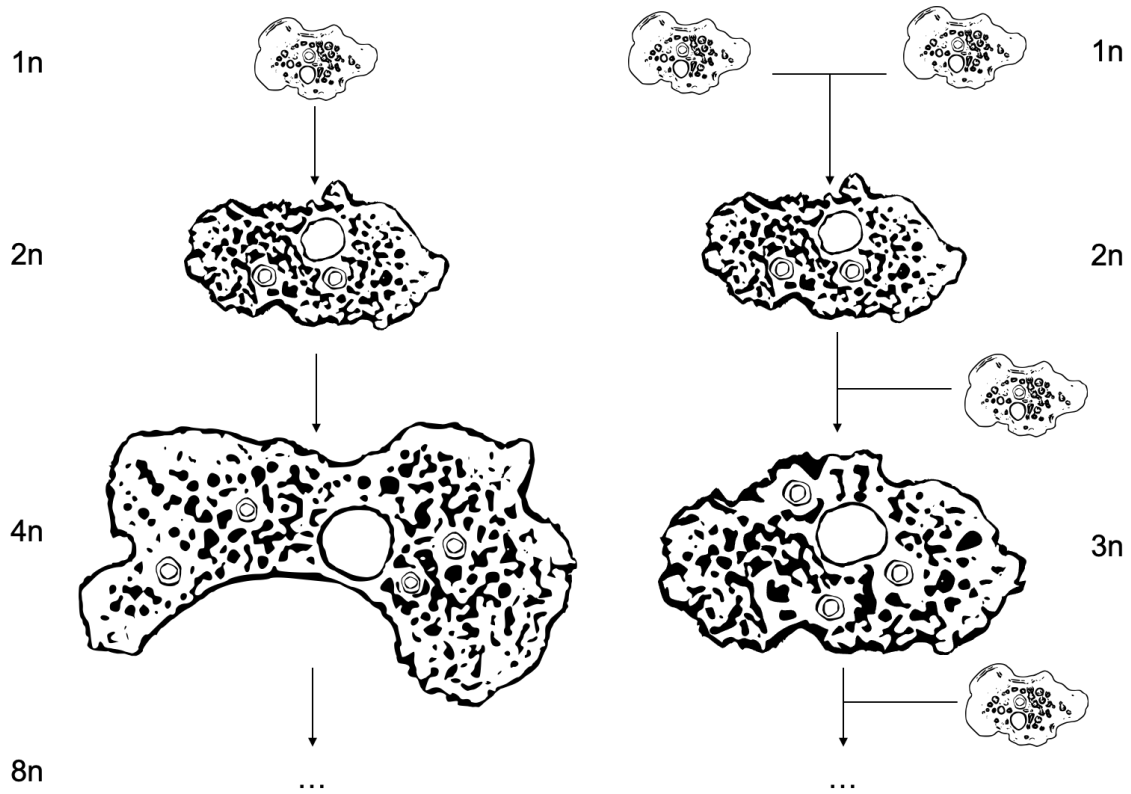

**Figure S3. Potential origins of cellular multinuclearity.** Multinucleate cells can be generated by endoreplication (left panel), for which the DNA content replicates synchronously in the absence of cytokinesis or by successive fusion events (right panel).
